# Supplementary material for: Long transposon-rich centromeres in an oomycete reveal divergence of centromere features in Stramenopila-Alveolata-Rhizaria lineages
Source: PubMed Central journal article supplement (PMC7082073; doi:10.1371/journal.pgen.1008646), 2020-03-09
Supplement: pgen.1008646.s006.pdf [file pgen.1008646.s006.pdf]

**A**

*P. sojae* V3

*Psojae*2019.1

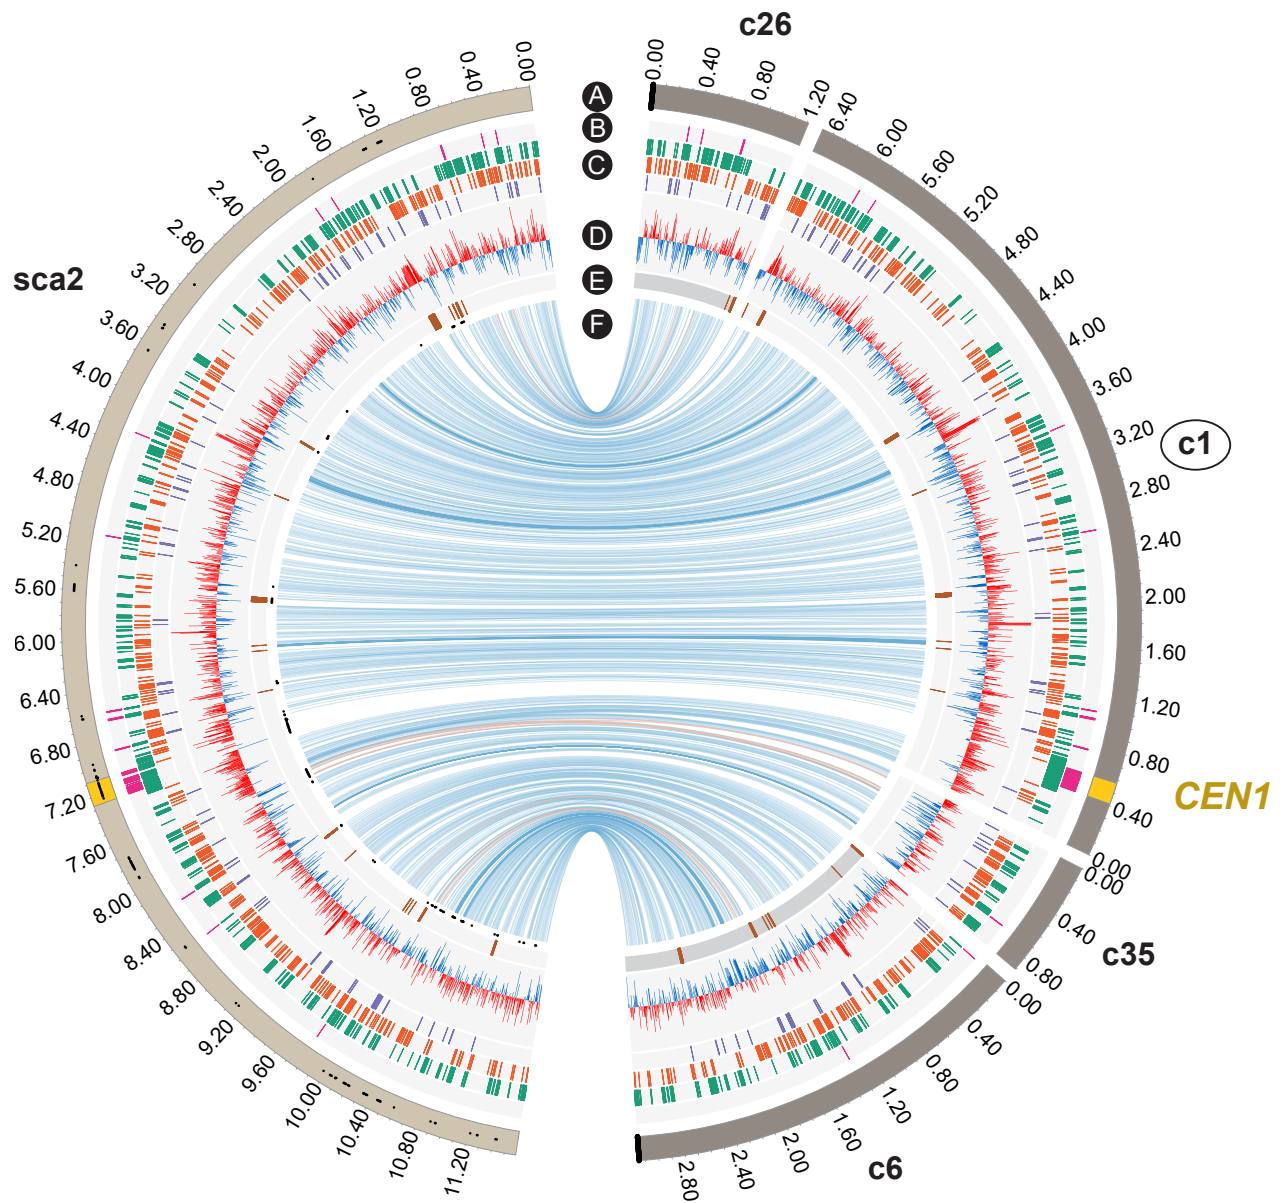

key:

|                                                                                                                                                   |                                                                       |                                                                                             |
|---------------------------------------------------------------------------------------------------------------------------------------------------|-----------------------------------------------------------------------|---------------------------------------------------------------------------------------------|
| <b>A</b>   Telomeric repeats                                                                                                                      | <b>B</b>   <i>Copia</i> -like transposon (CoLT)                       | <b>D</b>   GC content (red above / blue below genome average (5 kb non-overlapping window)) |
| <b>C</b>   Transposable elements (from the outside inward):<br>LTR retrotransposons (green), DNA transposons (orange), Other transposons (purple) | <b>E</b>   tRNA genes (brown), contigs broken at tRNA clusters (grey) | <b>F</b>   BLASTn links (> 2 kb)                                                            |
| Centromeres (yellow)                                                                                                                              | Assembly gaps (dotted line)                                           |                                                                                             |

**B**

P. sojae V3

Psojae2019.1

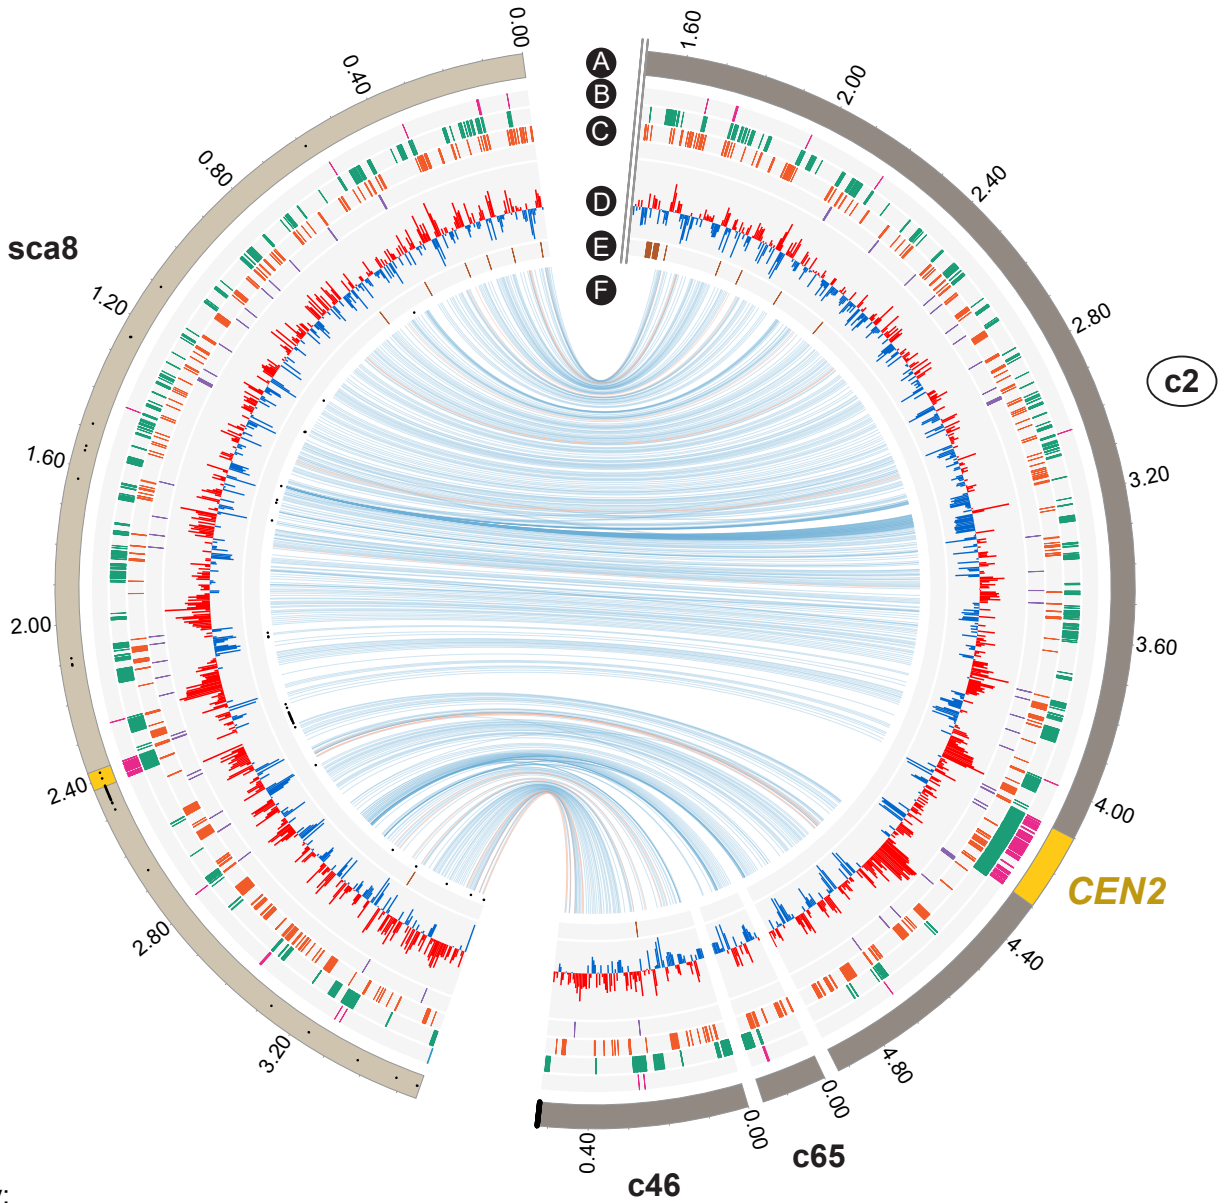

key:

- (A) | Telomeric repeats    ■ Centromeres    ... Assembly gaps
- (B) ■ Copia-like transposon (CoLT)
- (C) Transposable elements (from the outside inward):
  - LTR retrotransposons    ■ DNA transposons    ■ Other transposons

- (D) ■ GC content    red above / blue below genome average (5 kb non-overlapping window)
- (E) ■ tRNA genes    ■ contigs broken at tRNA clusters
- (F) ■ BLASTn links (> 2 kb)

C

P. sojae V3  Psojae2019.1

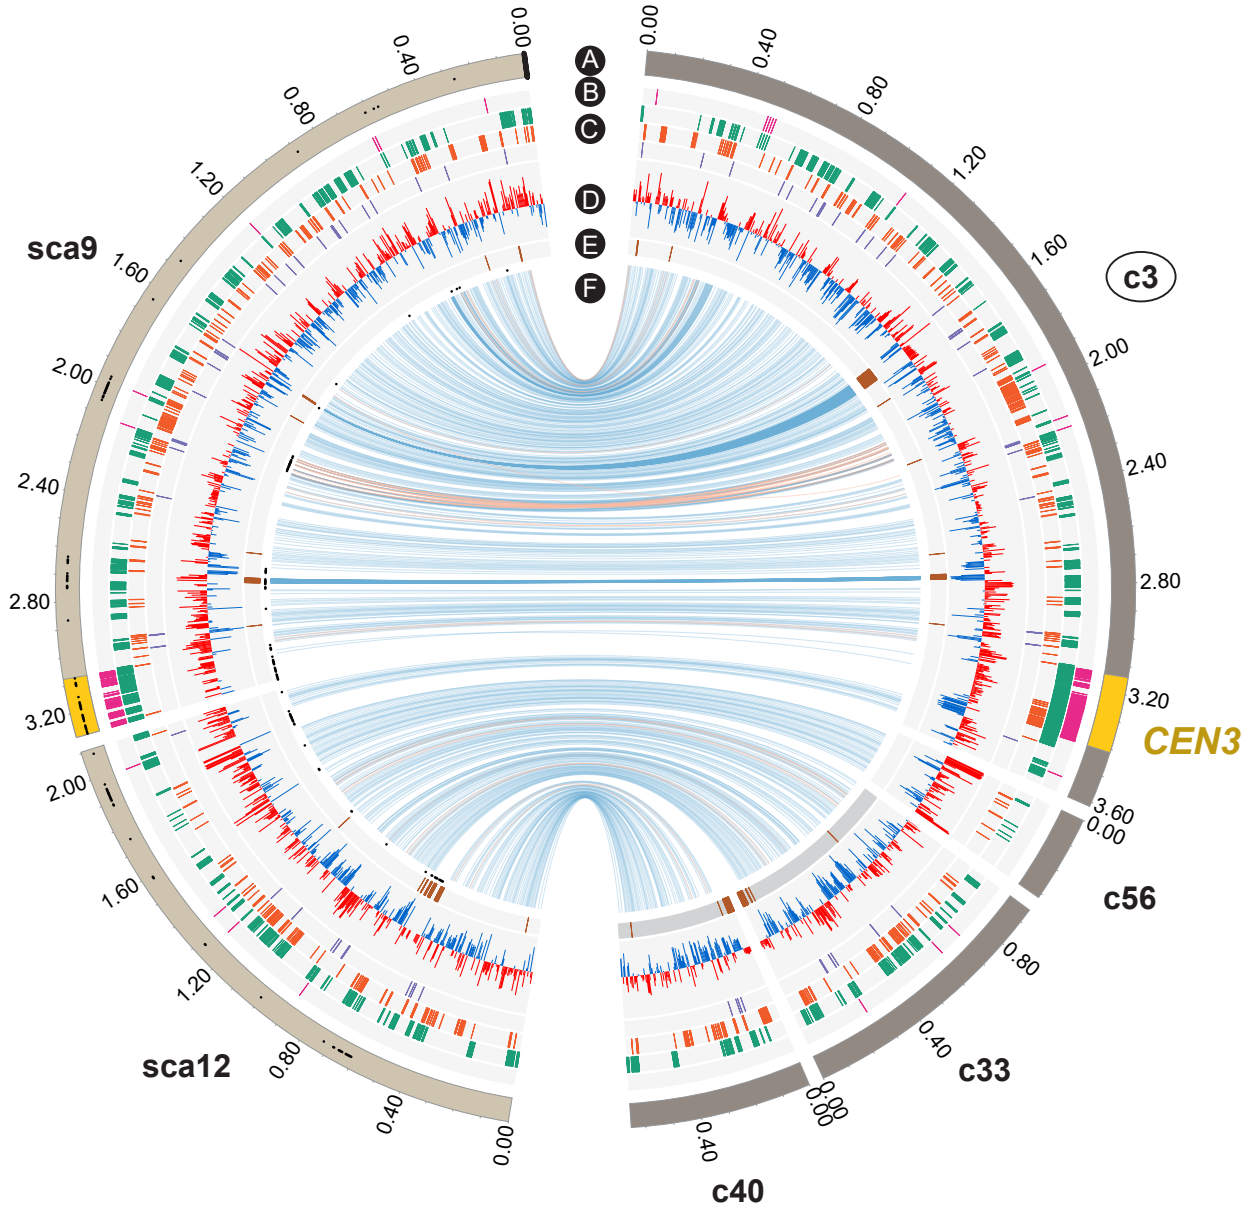

key:

- |                                                                                                                                                                                                                                                                                                                                                                                                                                                                                                                                                                                                                                                                                                                                                                                                                                                                                                                                                                                      |                                                                                                                                                                                                                                                                                                                                                                                                                                                                                                                                                                                                                                                                                                                                                                                                                                                     |
|--------------------------------------------------------------------------------------------------------------------------------------------------------------------------------------------------------------------------------------------------------------------------------------------------------------------------------------------------------------------------------------------------------------------------------------------------------------------------------------------------------------------------------------------------------------------------------------------------------------------------------------------------------------------------------------------------------------------------------------------------------------------------------------------------------------------------------------------------------------------------------------------------------------------------------------------------------------------------------------|-----------------------------------------------------------------------------------------------------------------------------------------------------------------------------------------------------------------------------------------------------------------------------------------------------------------------------------------------------------------------------------------------------------------------------------------------------------------------------------------------------------------------------------------------------------------------------------------------------------------------------------------------------------------------------------------------------------------------------------------------------------------------------------------------------------------------------------------------------|
| <ul style="list-style-type: none"> <li><b>(A)</b>   Telomeric repeats    <span style="display: inline-block; width: 15px; height: 15px; background-color: yellow; border: 1px solid black; margin-right: 5px;"></span> Centromeres    - - - Assembly gaps</li> <li><b>(B)</b>   <i>Copia</i>-like transposon (CoLT)</li> <li><b>(C)</b>   Transposable elements (from the outside inward):             <ul style="list-style-type: none"> <li><span style="display: inline-block; width: 15px; height: 15px; background-color: green; border: 1px solid black; margin-right: 5px;"></span> LTR retrotransposons</li> <li><span style="display: inline-block; width: 15px; height: 15px; background-color: orange; border: 1px solid black; margin-right: 5px;"></span> DNA transposons</li> <li><span style="display: inline-block; width: 15px; height: 15px; background-color: blue; border: 1px solid black; margin-right: 5px;"></span> Other transposons</li> </ul> </li> </ul> | <ul style="list-style-type: none"> <li><b>(D)</b>   <span style="display: inline-block; width: 15px; height: 15px; background-color: red; border: 1px solid black; margin-right: 5px;"></span> <span style="display: inline-block; width: 15px; height: 15px; background-color: blue; border: 1px solid black; margin-right: 5px;"></span> GC content    red above / blue below genome average (5 kb non-overlapping window)</li> <li><b>(E)</b>   <span style="display: inline-block; width: 15px; height: 15px; background-color: brown; border: 1px solid black; margin-right: 5px;"></span> tRNA genes    <span style="display: inline-block; width: 15px; height: 15px; background-color: grey; border: 1px solid black; margin-right: 5px;"></span> contigs broken at tRNA clusters</li> <li><b>(F)</b>   BLASTn links (&gt; 2 kb)</li> </ul> |
|--------------------------------------------------------------------------------------------------------------------------------------------------------------------------------------------------------------------------------------------------------------------------------------------------------------------------------------------------------------------------------------------------------------------------------------------------------------------------------------------------------------------------------------------------------------------------------------------------------------------------------------------------------------------------------------------------------------------------------------------------------------------------------------------------------------------------------------------------------------------------------------------------------------------------------------------------------------------------------------|-----------------------------------------------------------------------------------------------------------------------------------------------------------------------------------------------------------------------------------------------------------------------------------------------------------------------------------------------------------------------------------------------------------------------------------------------------------------------------------------------------------------------------------------------------------------------------------------------------------------------------------------------------------------------------------------------------------------------------------------------------------------------------------------------------------------------------------------------------|

**D****P. sojae V3****Psojae2019.1**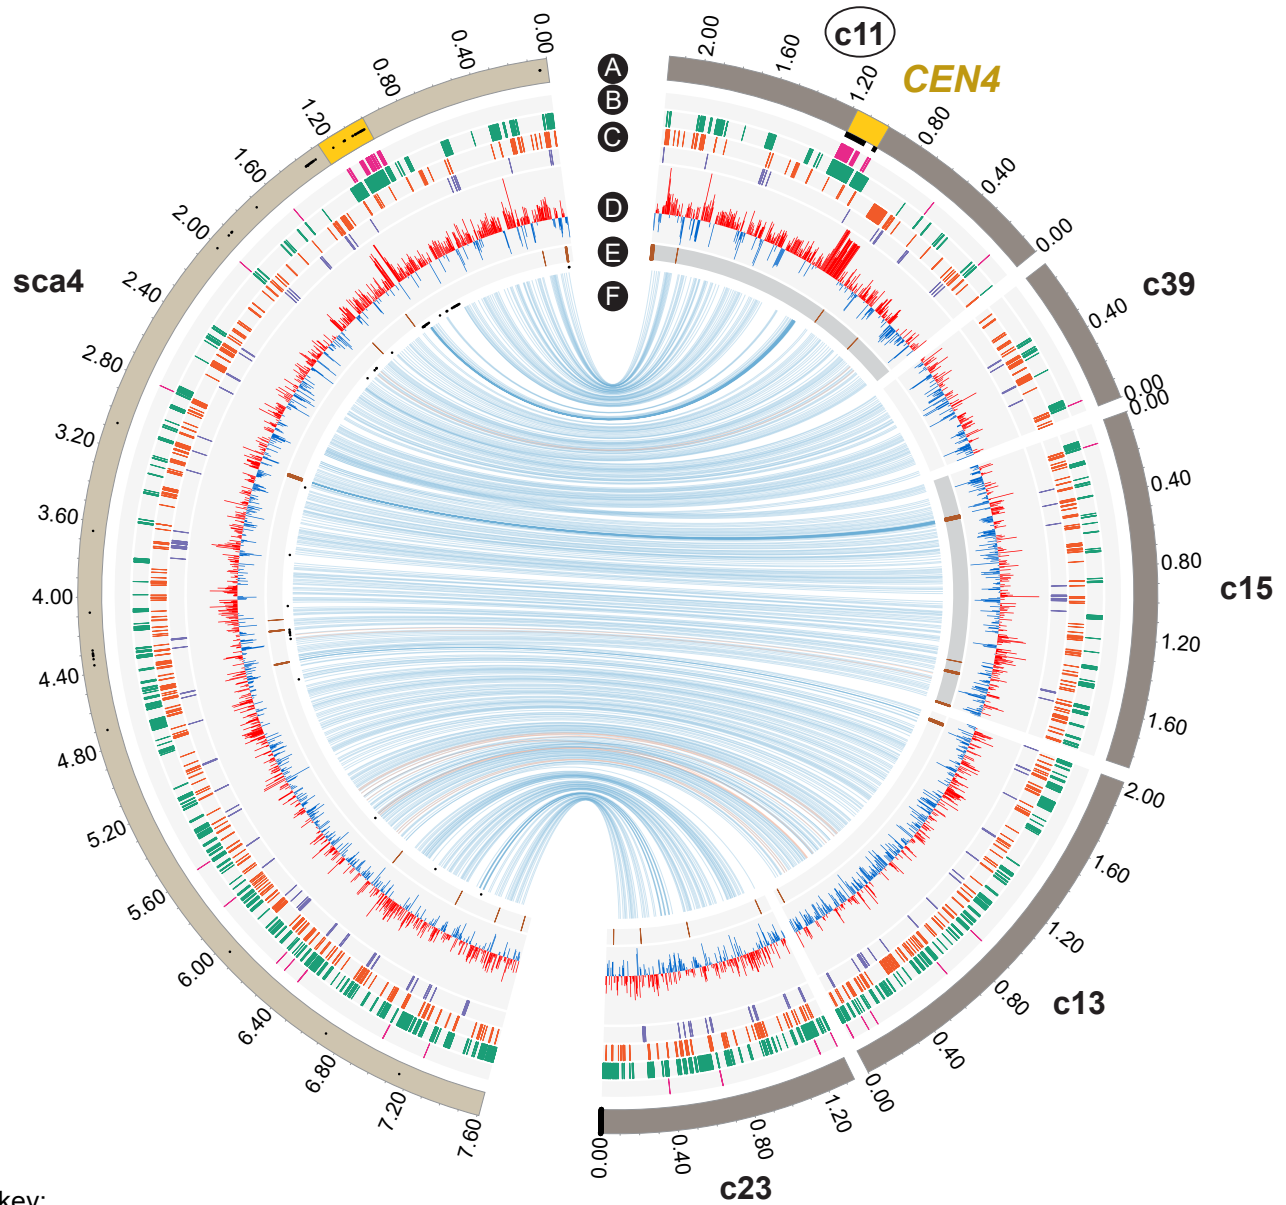

key:

- A** | Telomeric repeats    **C** Centromeres    --- Assembly gaps
- B** | *Copia*-like transposon (CoLT)
- C** | Transposable elements (from the outside inward):
  - █ LTR retrotransposons    █ DNA transposons    █ Other transposons

- D** | **+** GC content    red above / blue below genome average  
(5 kb non-overlapping window)
- E** | tRNA genes    █ contigs broken at tRNA clusters
- F** | BLASTn links (> 2 kb)



E

P. sojae V3  Psojae2019.1

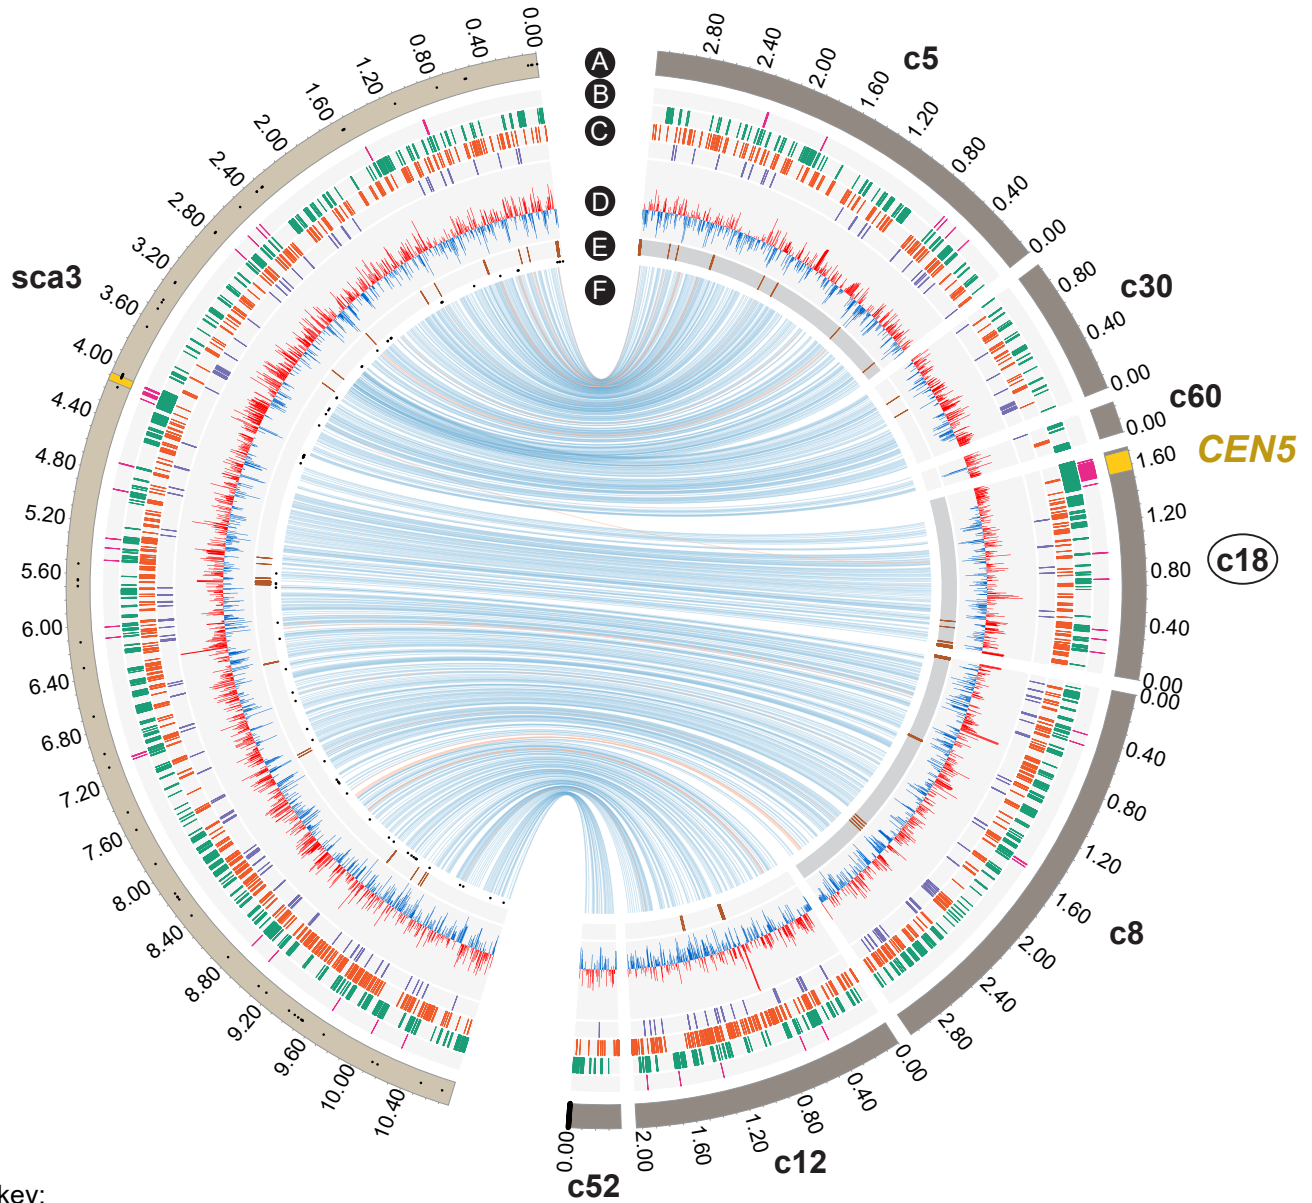

key:

|                                                                                                                                                                                      |                                                                                                                                                                   |                                                                                                                                                                  |                                                                                                                                                                                                                                                                                                                   |                                                                                                                                                                                |
|--------------------------------------------------------------------------------------------------------------------------------------------------------------------------------------|-------------------------------------------------------------------------------------------------------------------------------------------------------------------|------------------------------------------------------------------------------------------------------------------------------------------------------------------|-------------------------------------------------------------------------------------------------------------------------------------------------------------------------------------------------------------------------------------------------------------------------------------------------------------------|--------------------------------------------------------------------------------------------------------------------------------------------------------------------------------|
| <b>A</b>   Telomeric repeats                                                                                                                                                         | <b>Centromeres</b> <span style="display: inline-block; width: 15px; height: 15px; background-color: #ffcc00; border: 1px solid black; margin-right: 5px;"></span> | <b>...</b> Assembly gaps                                                                                                                                         | <b>D</b> <span style="display: inline-block; width: 15px; height: 15px; background-color: #ff0000; border: 1px solid black; margin-right: 5px;"></span> <span style="display: inline-block; width: 15px; height: 15px; background-color: #0000ff; border: 1px solid black; margin-right: 5px;"></span> GC content | red above / blue below genome average (5 kb non-overlapping window)                                                                                                            |
| <b>B</b> <span style="display: inline-block; width: 15px; height: 15px; background-color: #ff00ff; border: 1px solid black; margin-right: 5px;"></span> Copia-like transposon (CoLT) |                                                                                                                                                                   |                                                                                                                                                                  | <b>E</b> <span style="display: inline-block; width: 15px; height: 15px; background-color: #800000; border: 1px solid black; margin-right: 5px;"></span> tRNA genes                                                                                                                                                | <span style="display: inline-block; width: 15px; height: 15px; background-color: #cccccc; border: 1px solid black; margin-right: 5px;"></span> contigs broken at tRNA clusters |
| <b>C</b> Transposable elements (from the outside inward):                                                                                                                            |                                                                                                                                                                   |                                                                                                                                                                  | <b>F</b> <span style="display: inline-block; width: 15px; height: 15px; background-color: #000000; border: 1px solid black; border-radius: 50%; margin-right: 5px;"></span> BLASTn links (> 2 kb)                                                                                                                 |                                                                                                                                                                                |
| <span style="display: inline-block; width: 15px; height: 15px; background-color: #008000; border: 1px solid black; margin-right: 5px;"></span> LTR retrotransposons                  | <span style="display: inline-block; width: 15px; height: 15px; background-color: #ff0000; border: 1px solid black; margin-right: 5px;"></span> DNA transposons    | <span style="display: inline-block; width: 15px; height: 15px; background-color: #0000ff; border: 1px solid black; margin-right: 5px;"></span> Other transposons |                                                                                                                                                                                                                                                                                                                   |                                                                                                                                                                                |

F

P. sojae V3   Psojae2019.1

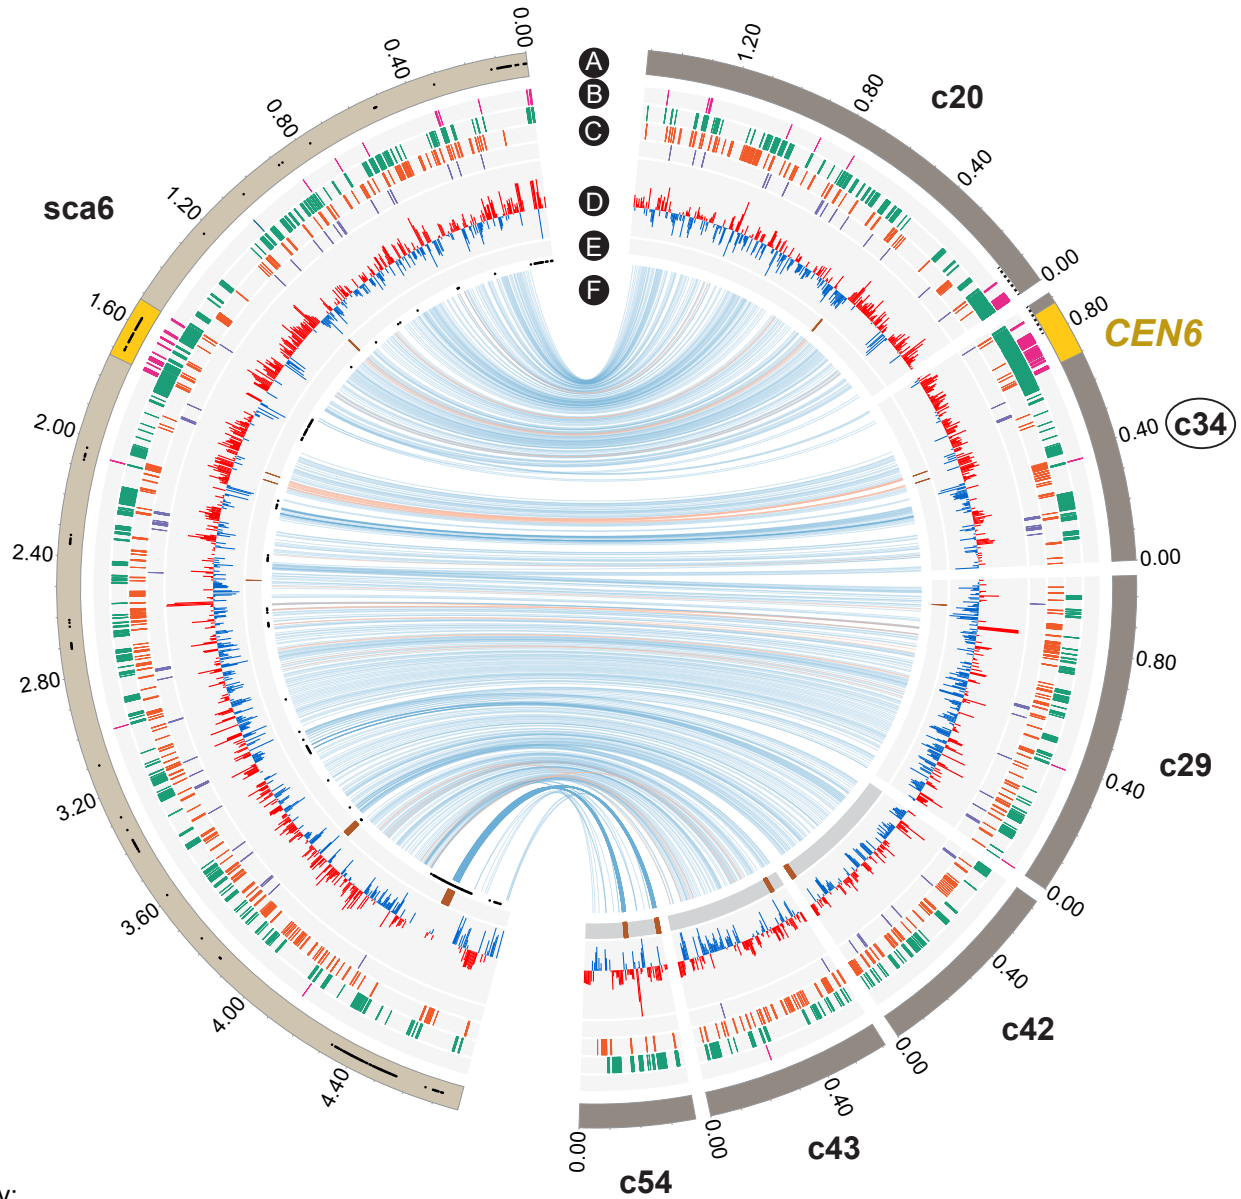

key:

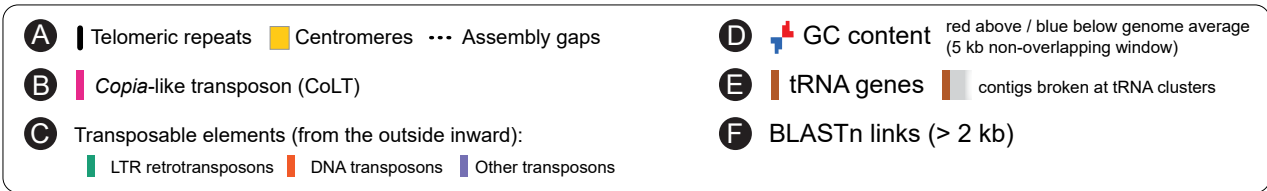

**G**

P. sojae V3

Psojae2019.1

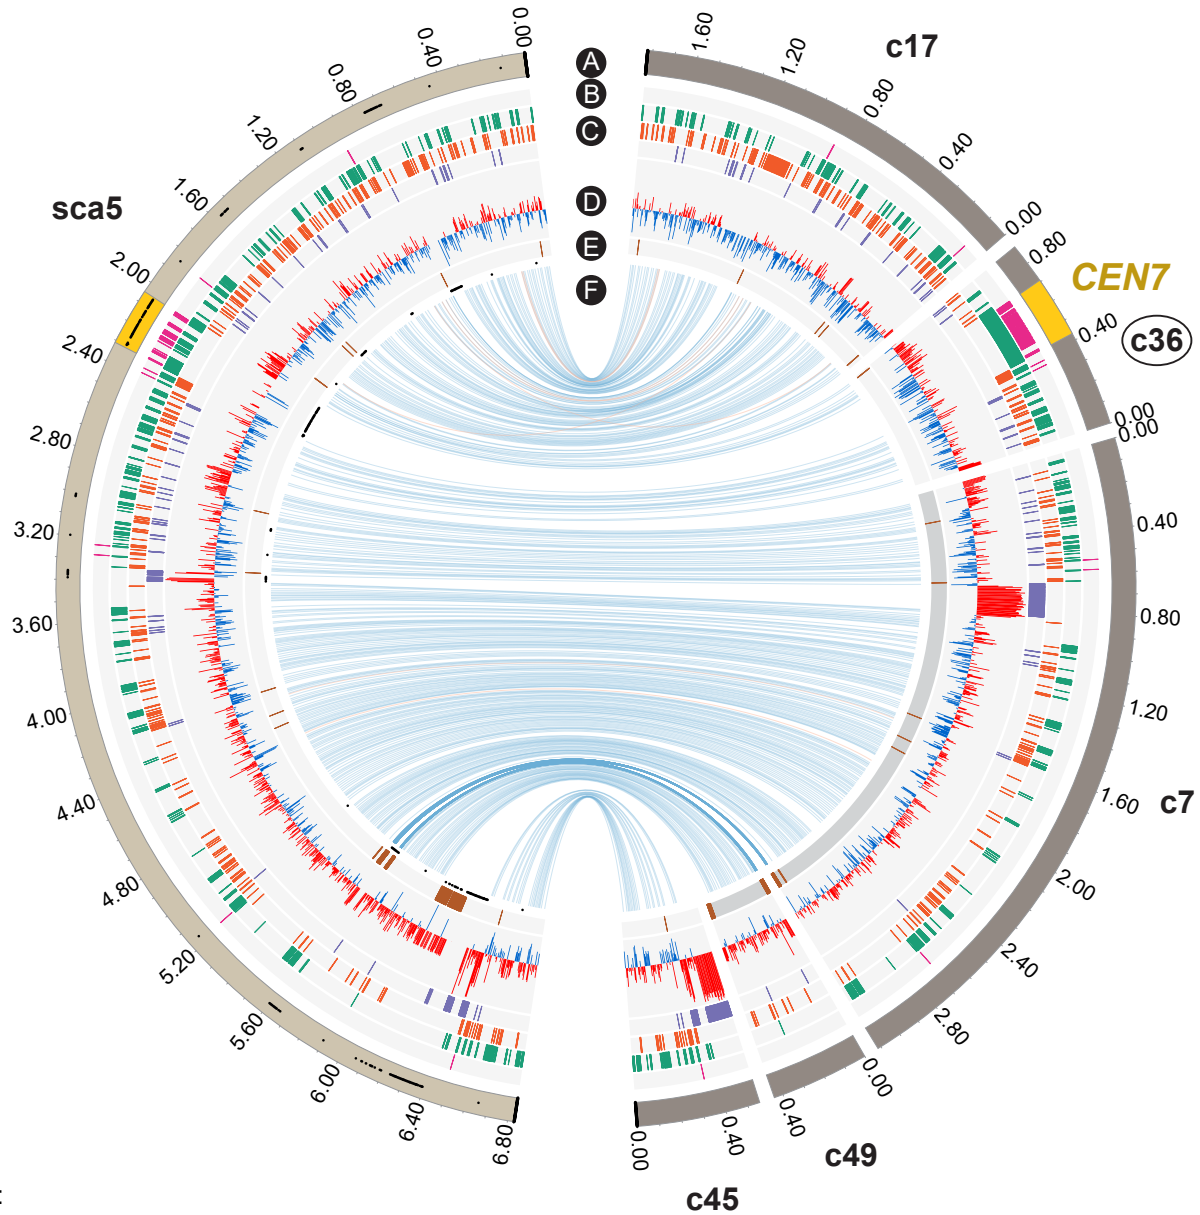

key:

- A** | Telomeric repeats    **■** Centromeres    **...** Assembly gaps
- B** | *Copia*-like transposon (CoLT)
- C** | Transposable elements (from the outside inward):
  - LTR retrotransposons    **■** DNA transposons    **■** Other transposons

- D** | **+** GC content    red above / blue below genome average (5 kb non-overlapping window)
- E** | tRNA genes    **■** contigs broken at tRNA clusters
- F** | BLASTn links (> 2 kb)



H

*P. sojae* V3  *Psojae2019.1*

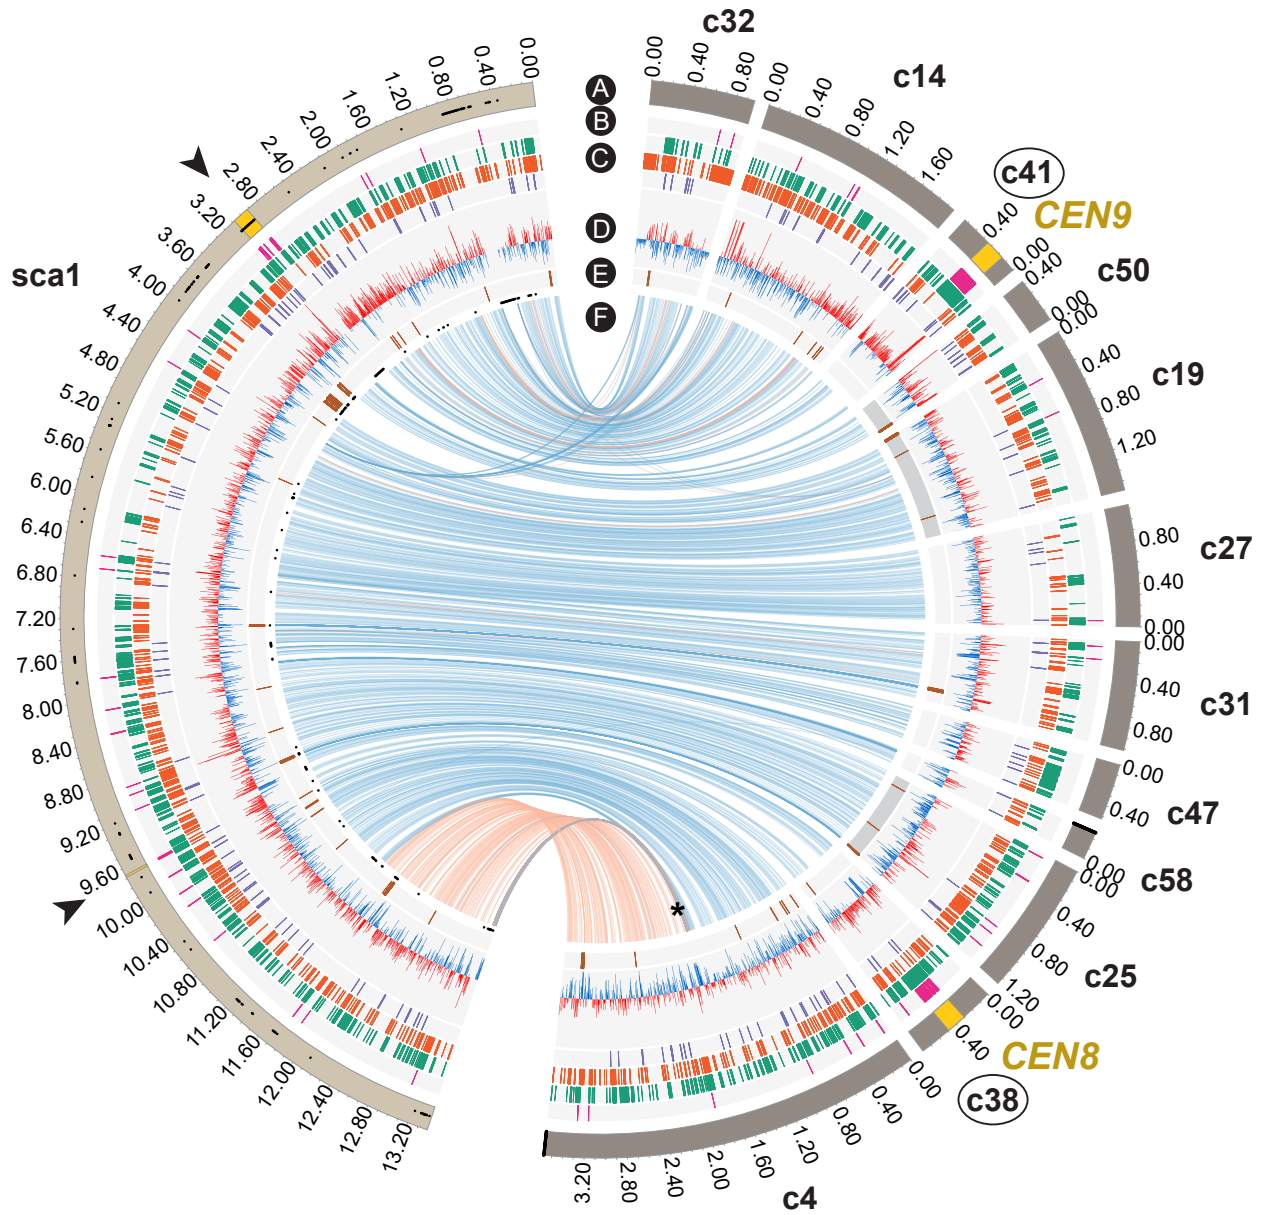

key:

|          |                                                                                                                                                                                                                                 |          |                                                                     |          |                                                                                      |
|----------|---------------------------------------------------------------------------------------------------------------------------------------------------------------------------------------------------------------------------------|----------|---------------------------------------------------------------------|----------|--------------------------------------------------------------------------------------|
| <b>A</b> | Telomeric repeats                                                                                                                                                                                                               | <b>B</b> | <i>Copia</i> -like transposon (CoLT)                                | <b>D</b> | GC content<br>red above / blue below genome average<br>(5 kb non-overlapping window) |
| <b>C</b> | Transposable elements (from the outside inward):<br><span style="color: green;">█</span> LTR retrotransposons<br><span style="color: orange;">█</span> DNA transposons<br><span style="color: blue;">█</span> Other transposons | <b>E</b> | tRNA genes                                                          | <b>F</b> | BLASTn links (> 2 kb)                                                                |
|          | <span style="color: yellow;">█</span> Centromeres                                                                                                                                                                               |          | <span style="color: grey;">█</span> contigs broken at tRNA clusters |          |                                                                                      |
|          | <span style="color: grey;">---</span> Assembly gaps                                                                                                                                                                             |          |                                                                     |          |                                                                                      |
