# Supplementary material for: Long transposon-rich centromeres in an oomycete reveal divergence of centromere features in Stramenopila-Alveolata-Rhizaria lineages
Source: PubMed Central journal article supplement (PMC7082073; doi:10.1371/journal.pgen.1008646), 2020-03-09

**A**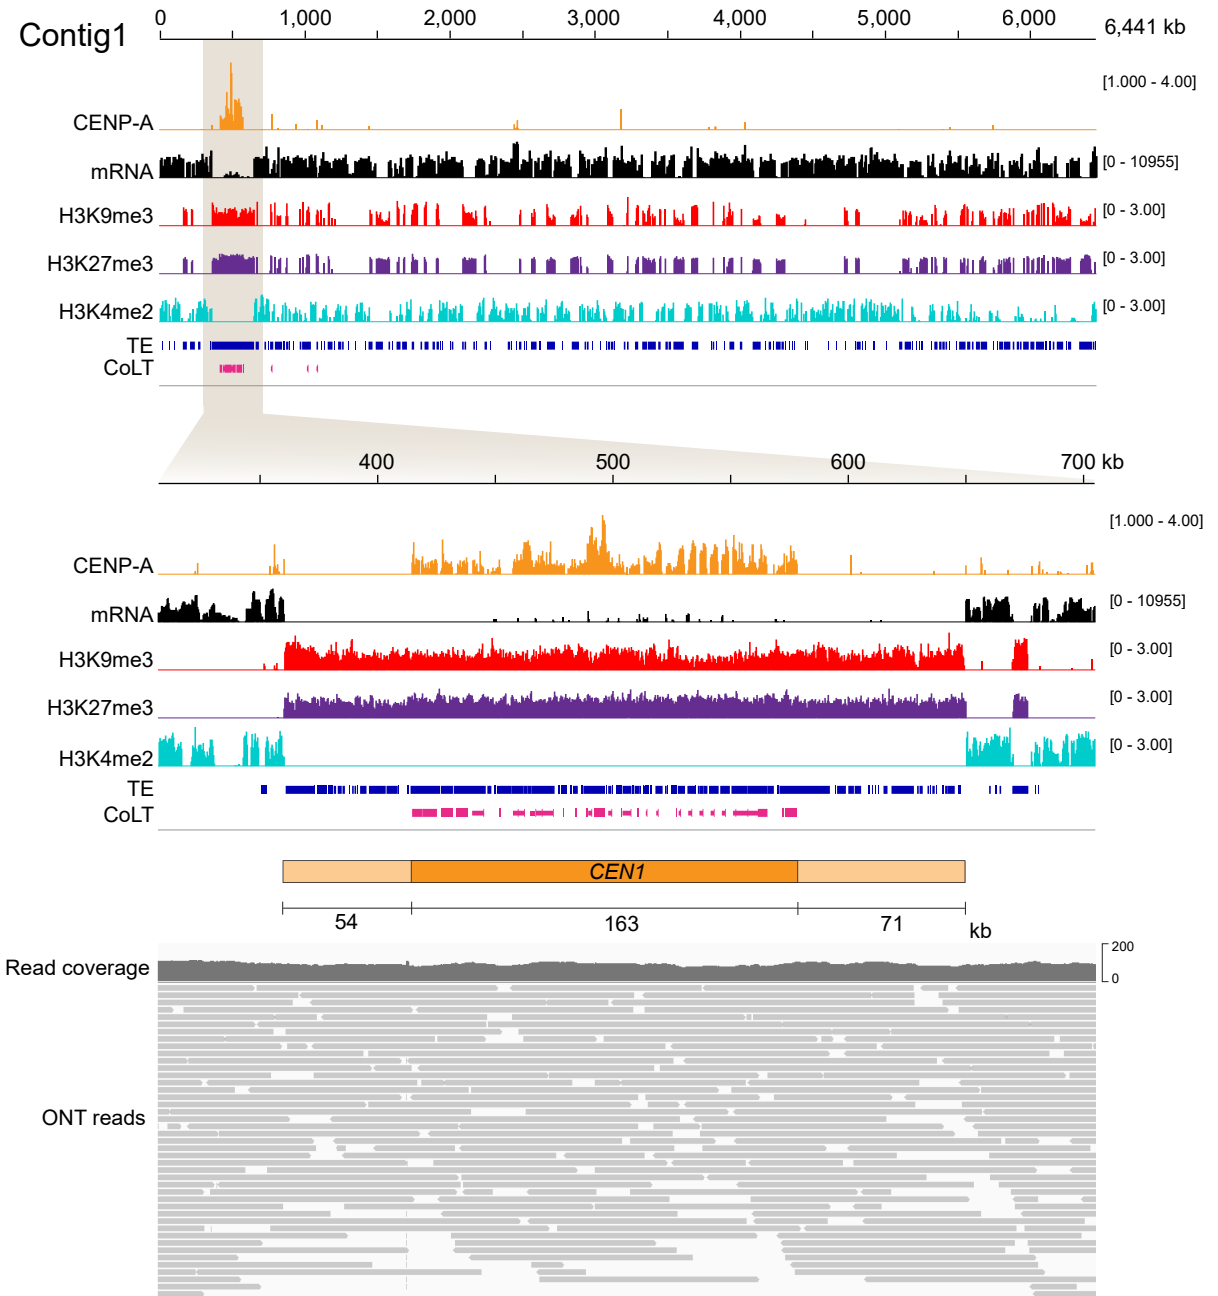

**B**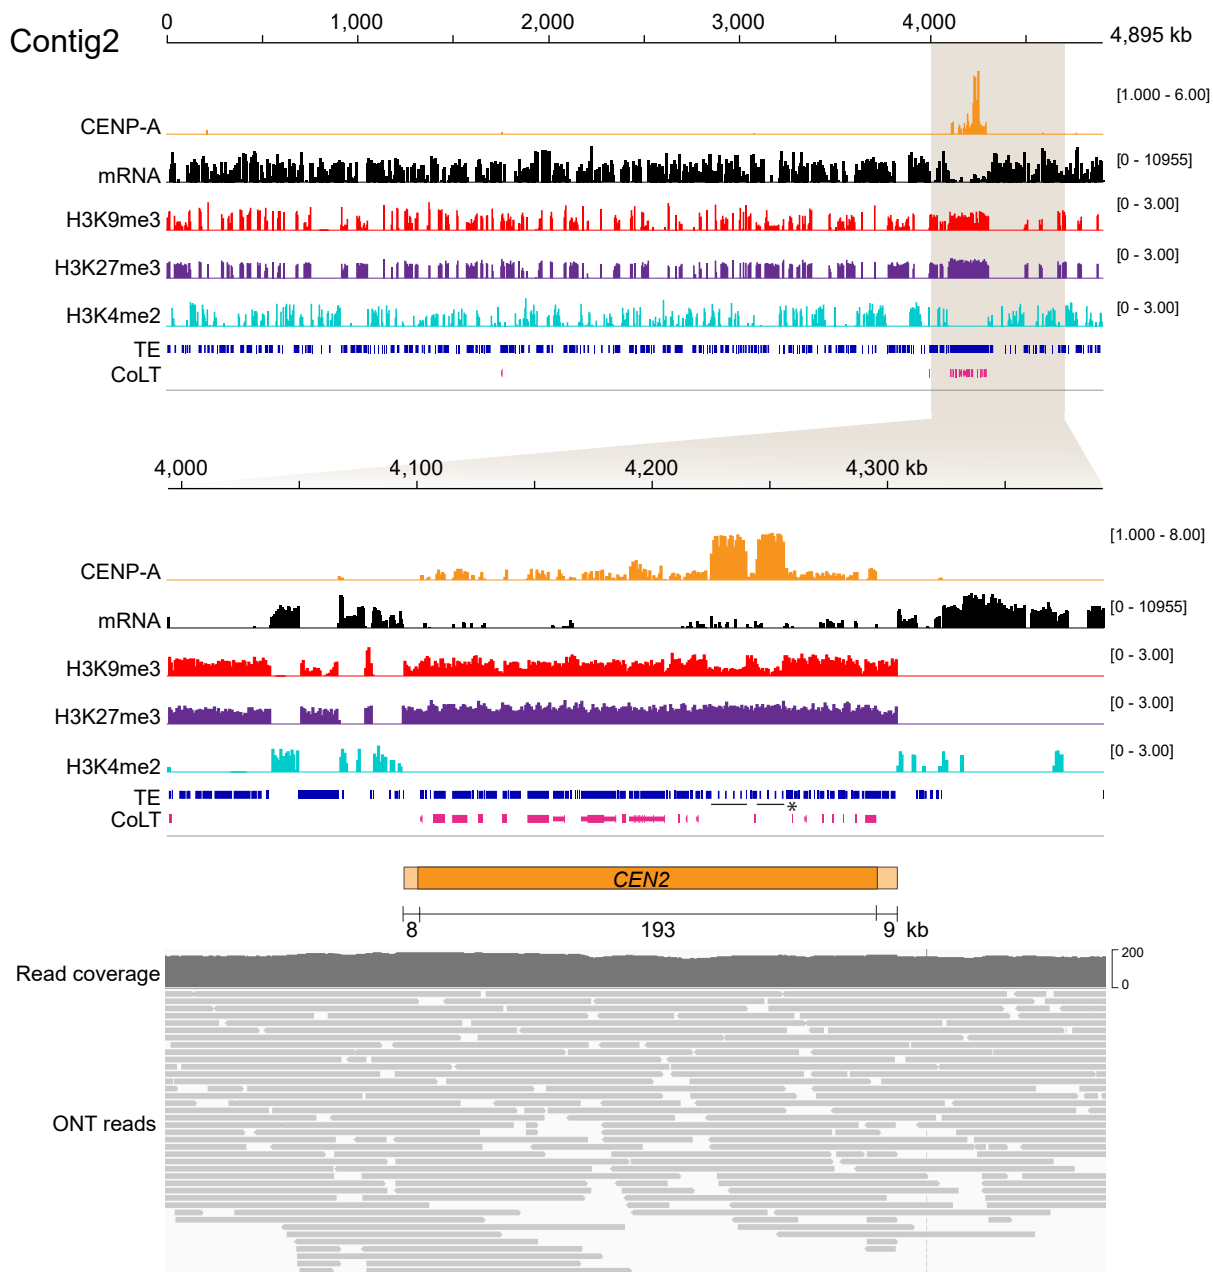

**C**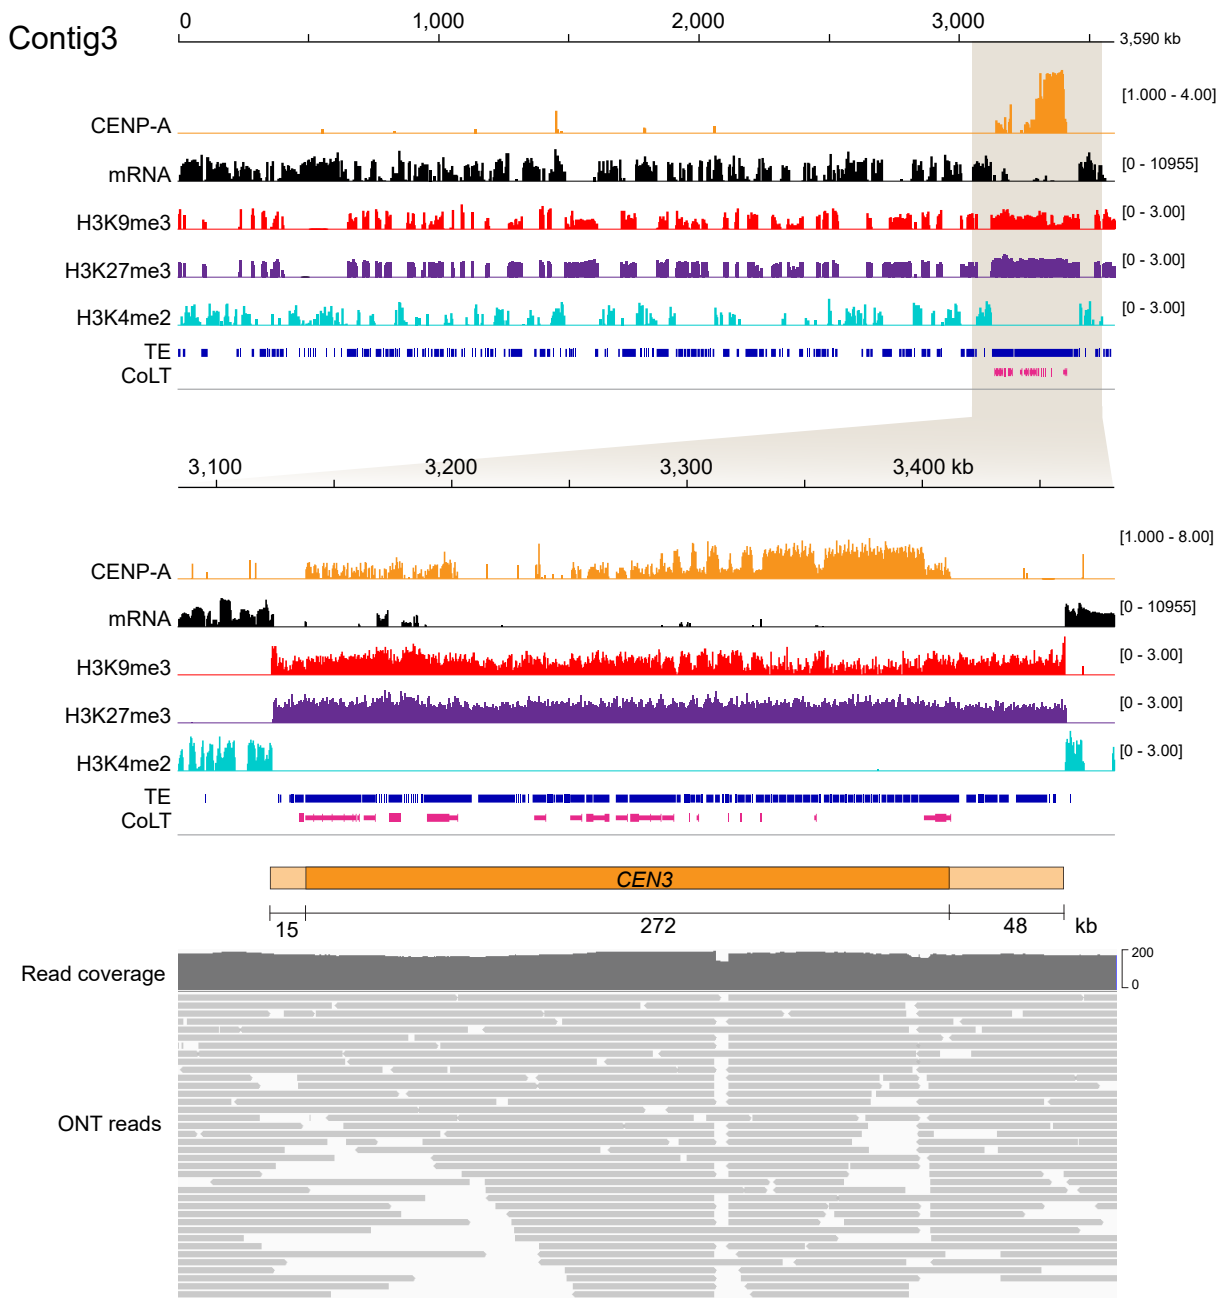

**D**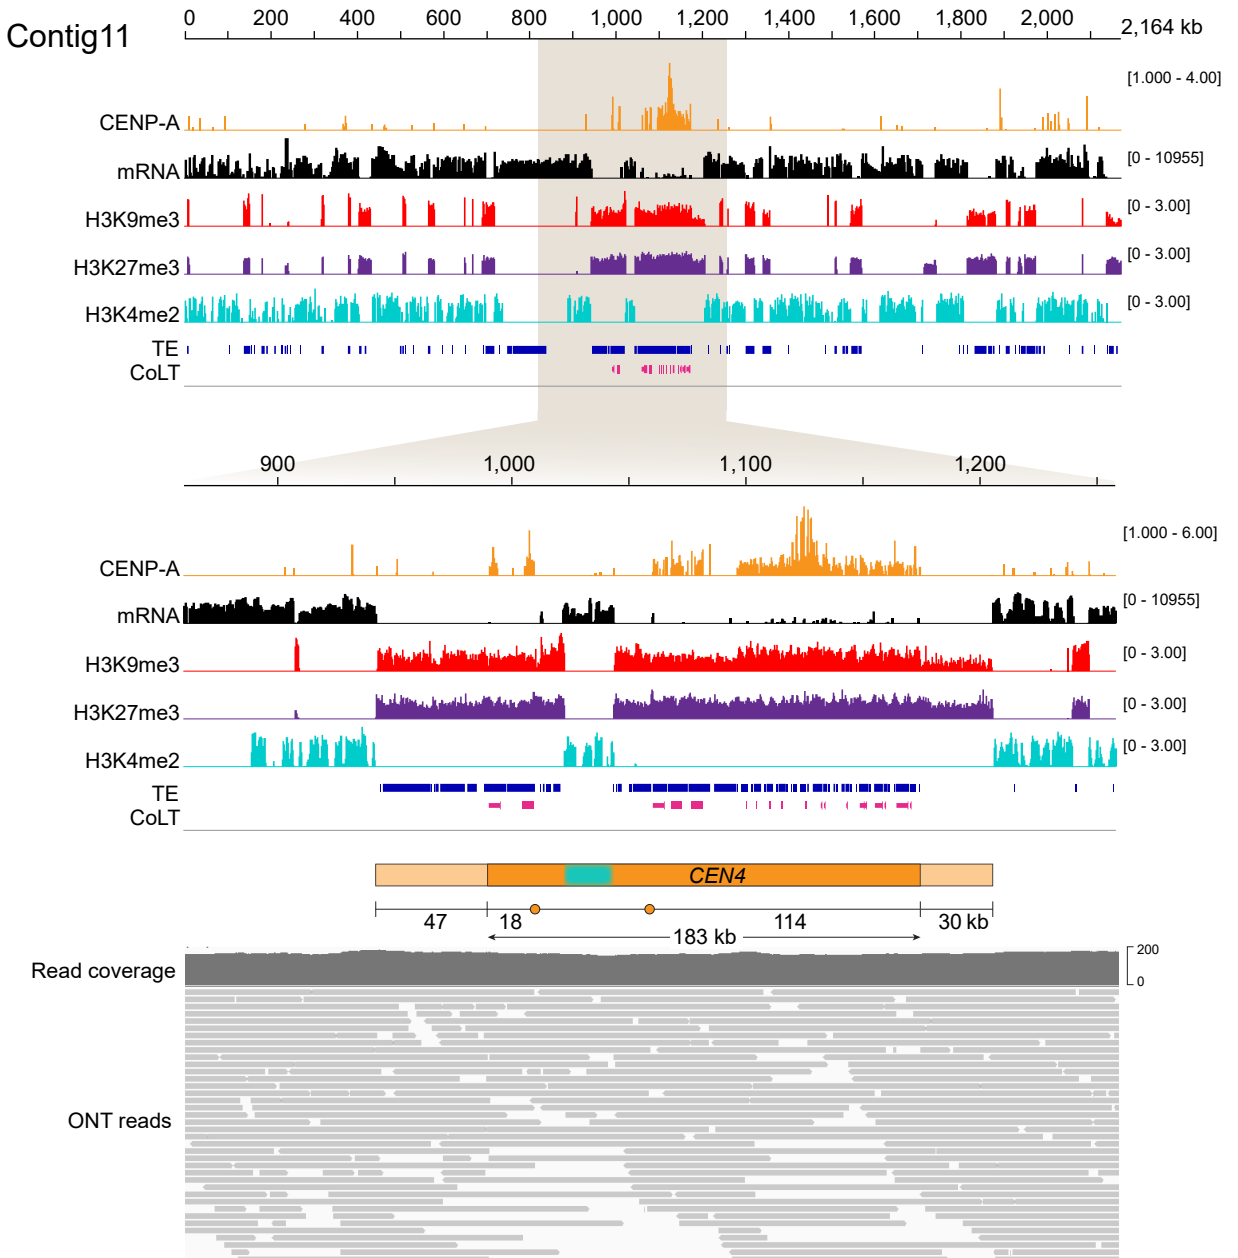

**E**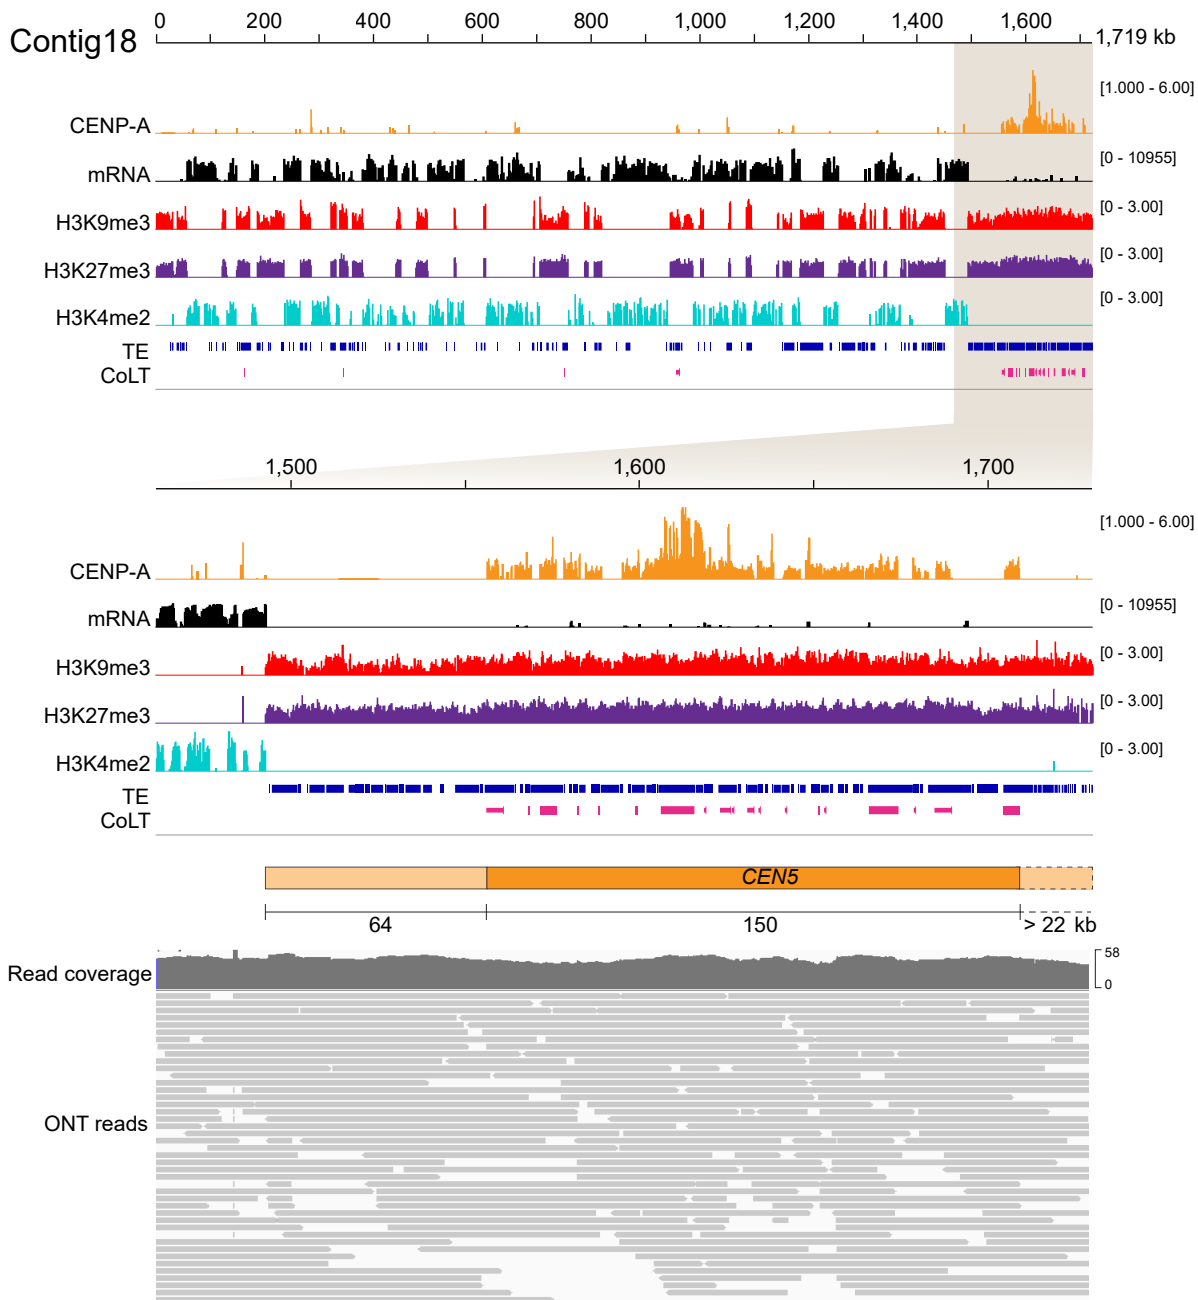

**F**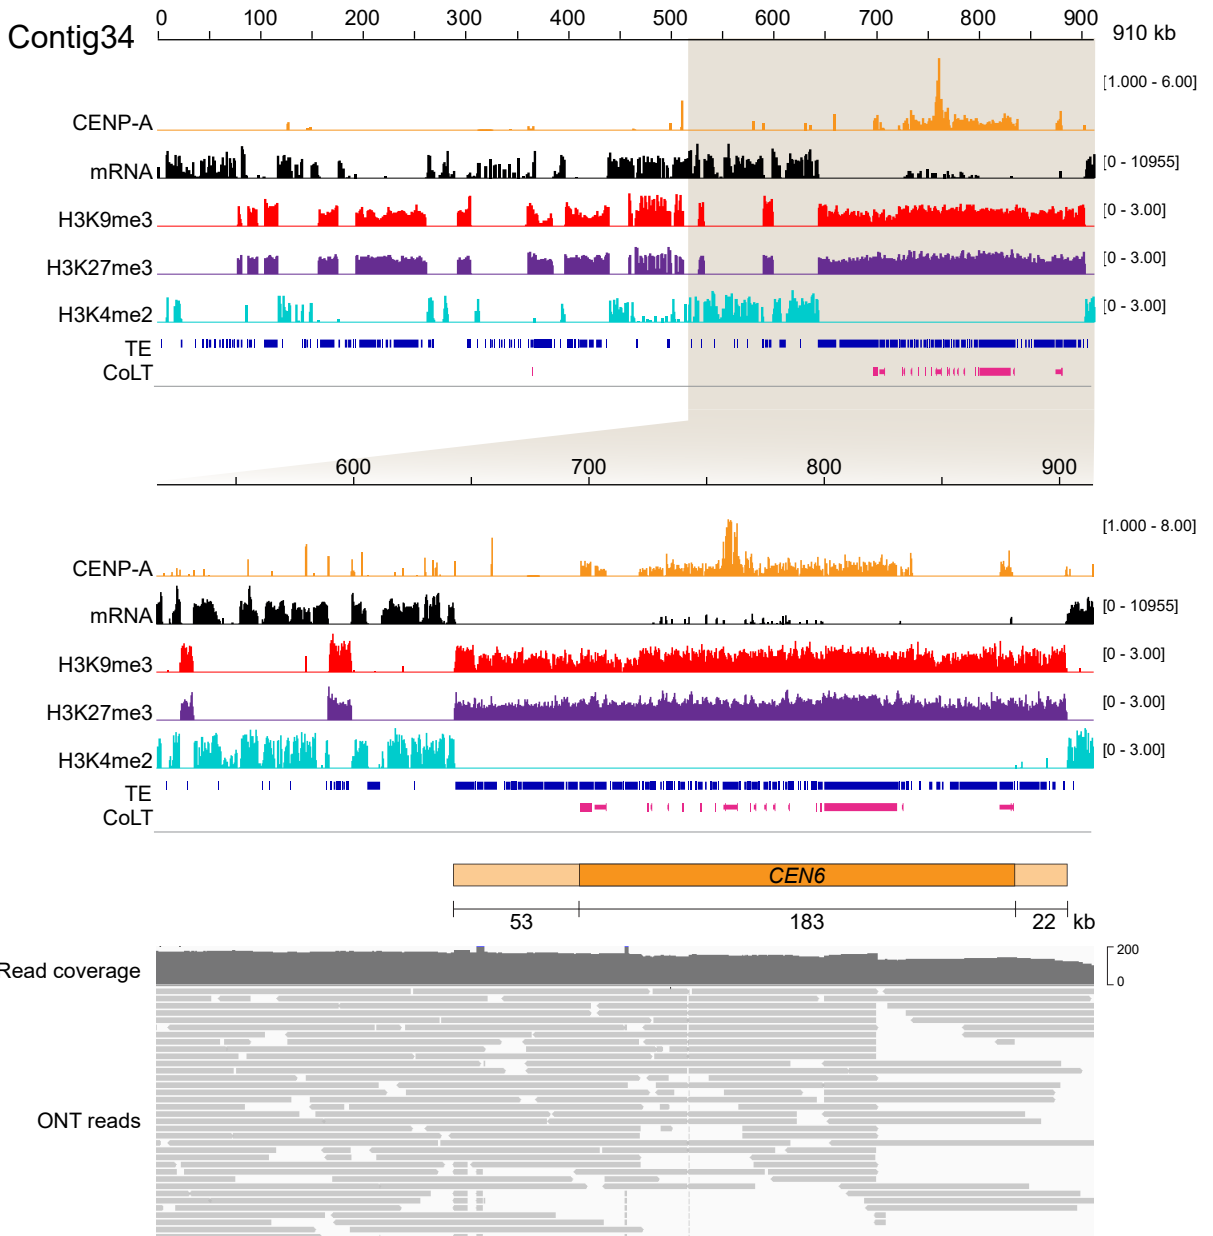

**G**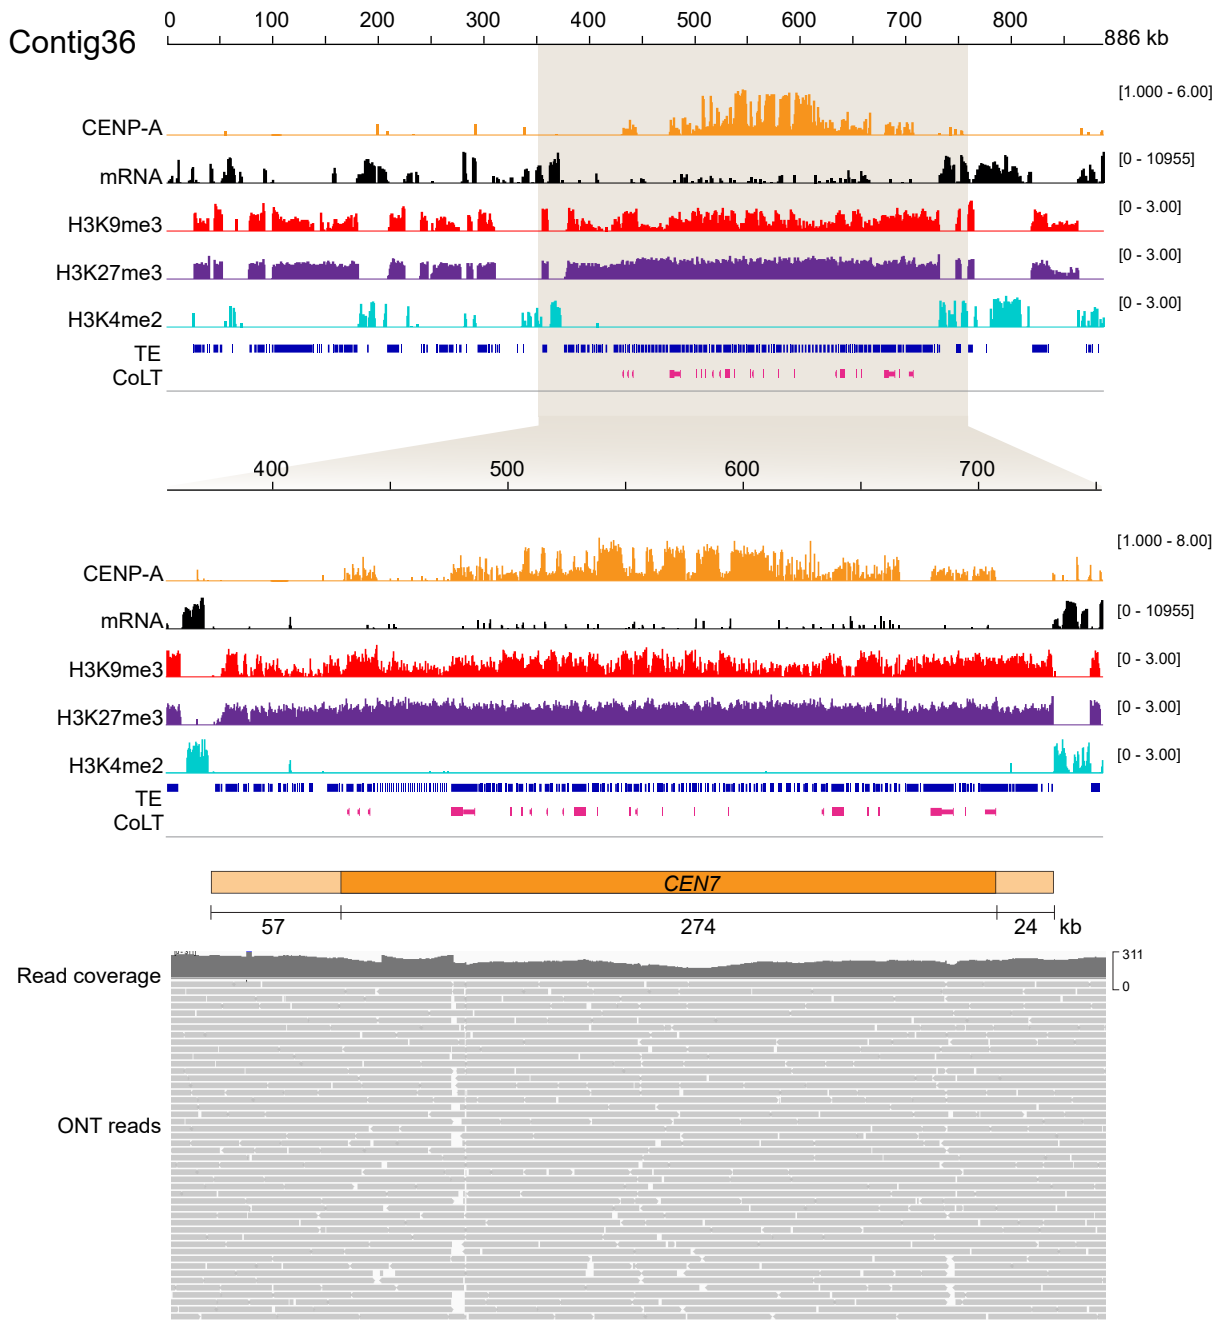

**H**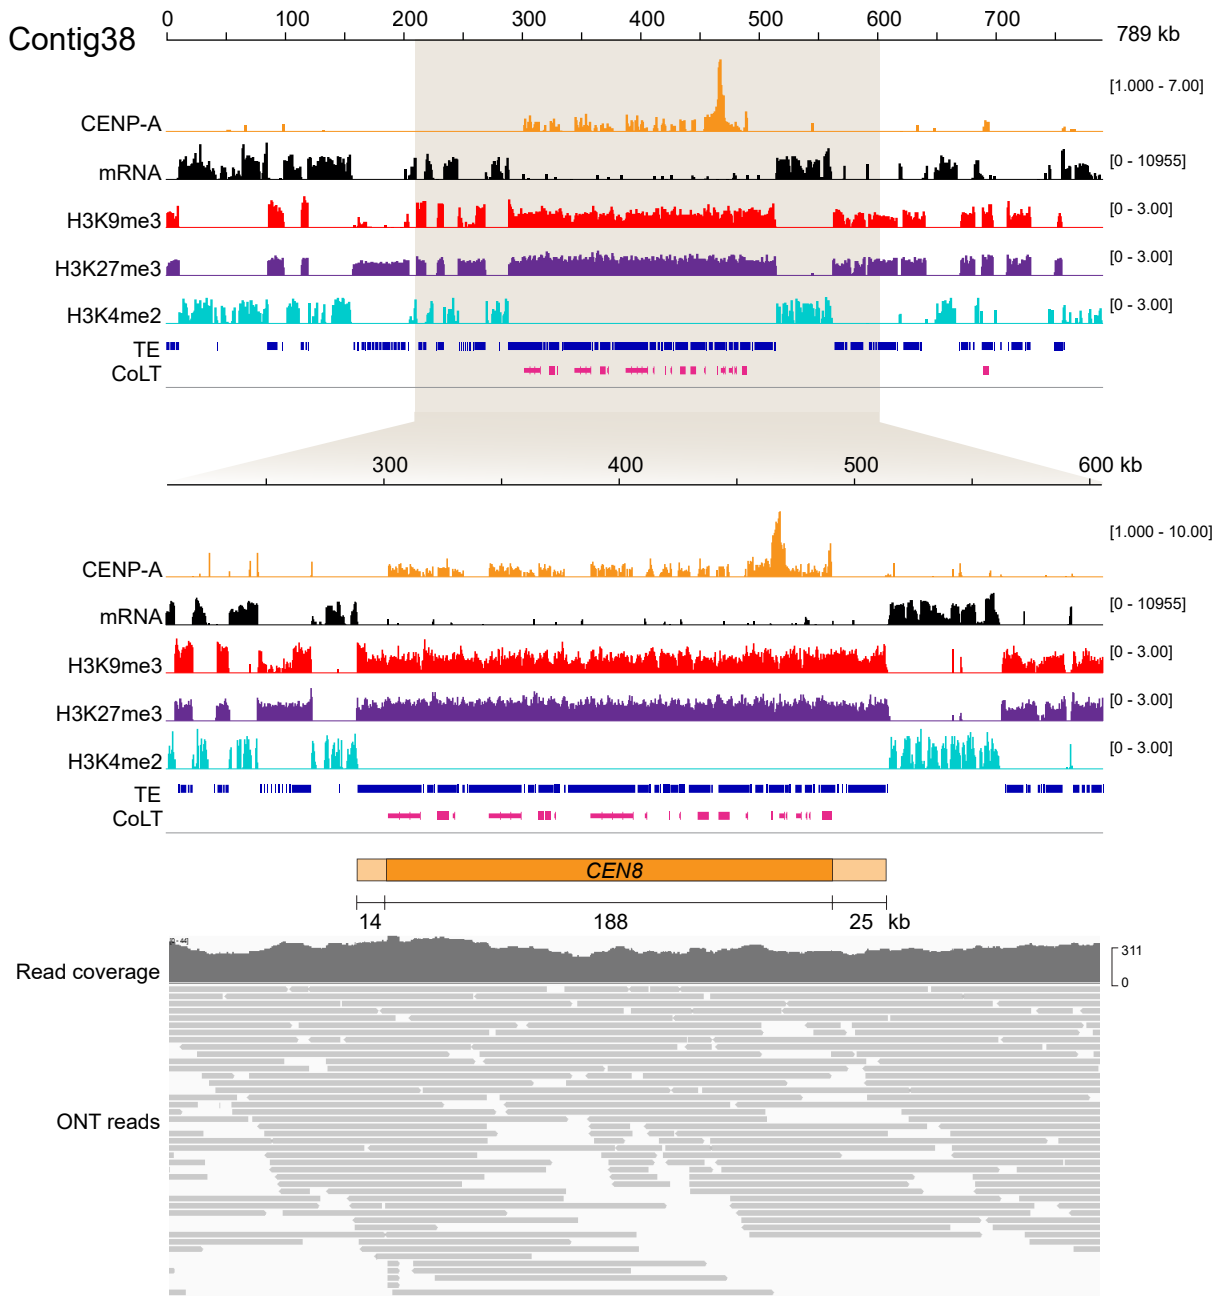



I

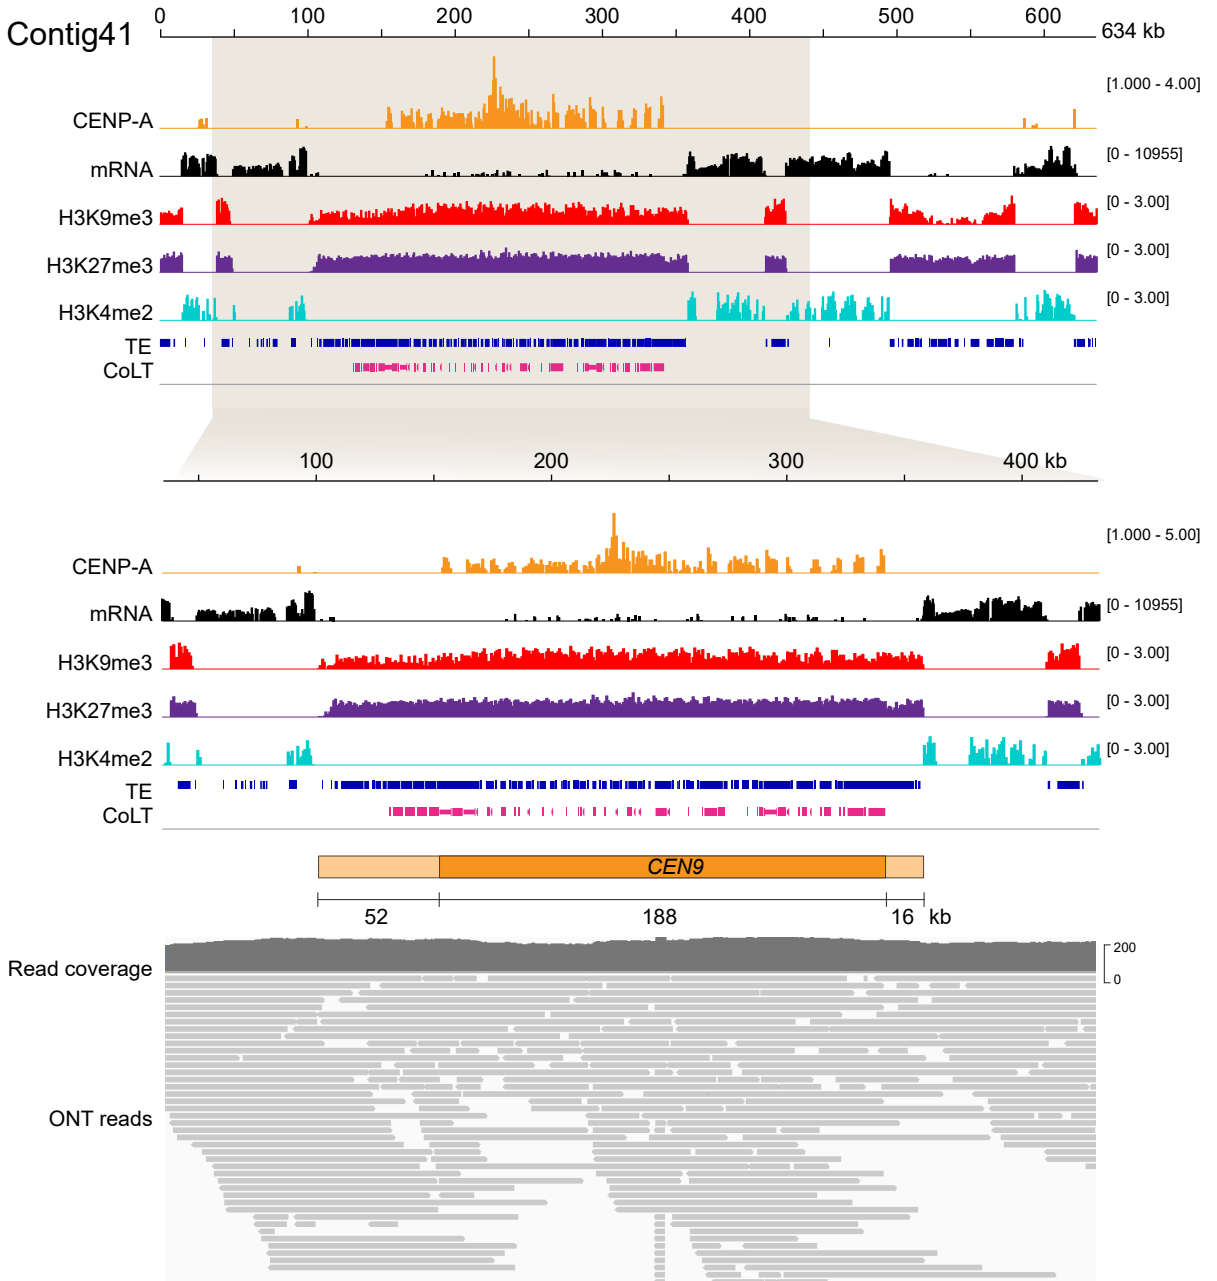

J

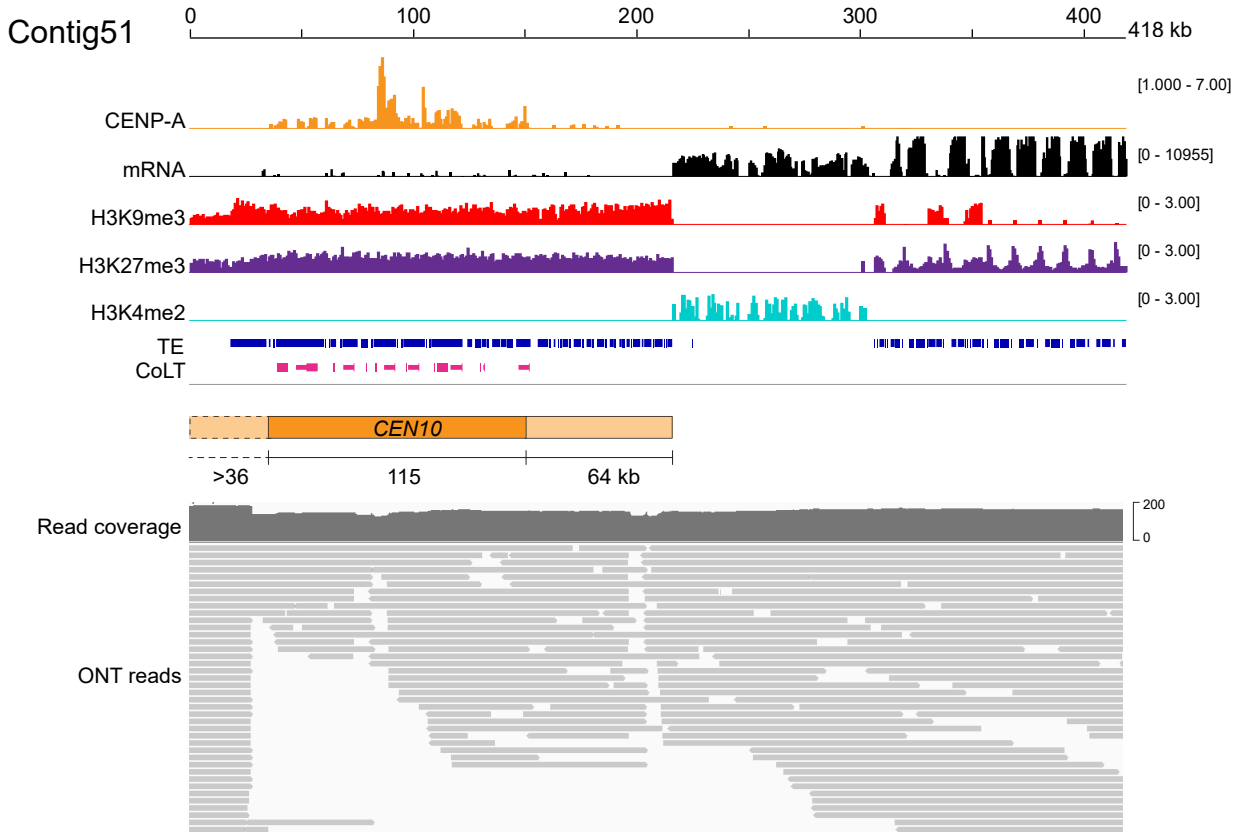

Supplement: pgen.1008646.s007.pdf [file pgen.1008646.s007.pdf]
